# Supplementary material for: Chemical and biological studies on the soft coralNephtheasp.
Source: Royal Society of Chemistry journal article supplement (doi:10.1039/d1ra03045k), 2021-01-01
Supplement: d1ra03045k1.pdf [file d1ra03045k1.pdf]

## **Supplementary Material**

**Chemical and biological studies on the soft coral *Nephthea* sp.**

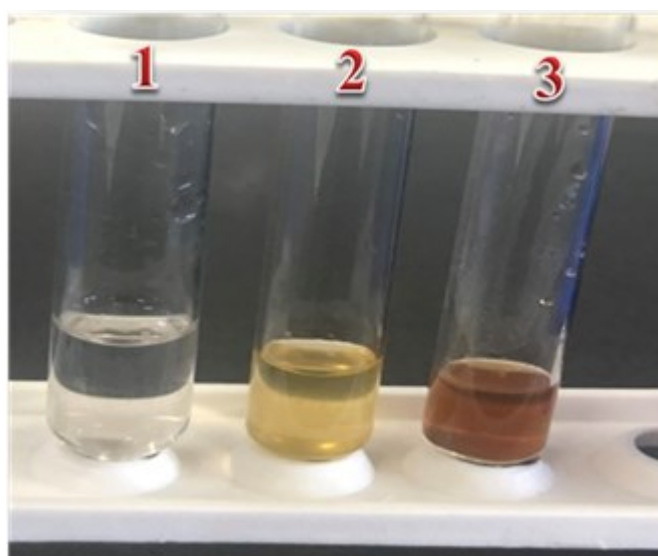

**Fig. S1: Colour change during the preparation of AgNPs using the total extract of *Nephthea* sp. (1: silver nitrate solution; 2: total extract; 3: total extract after formation of AgNPs).**

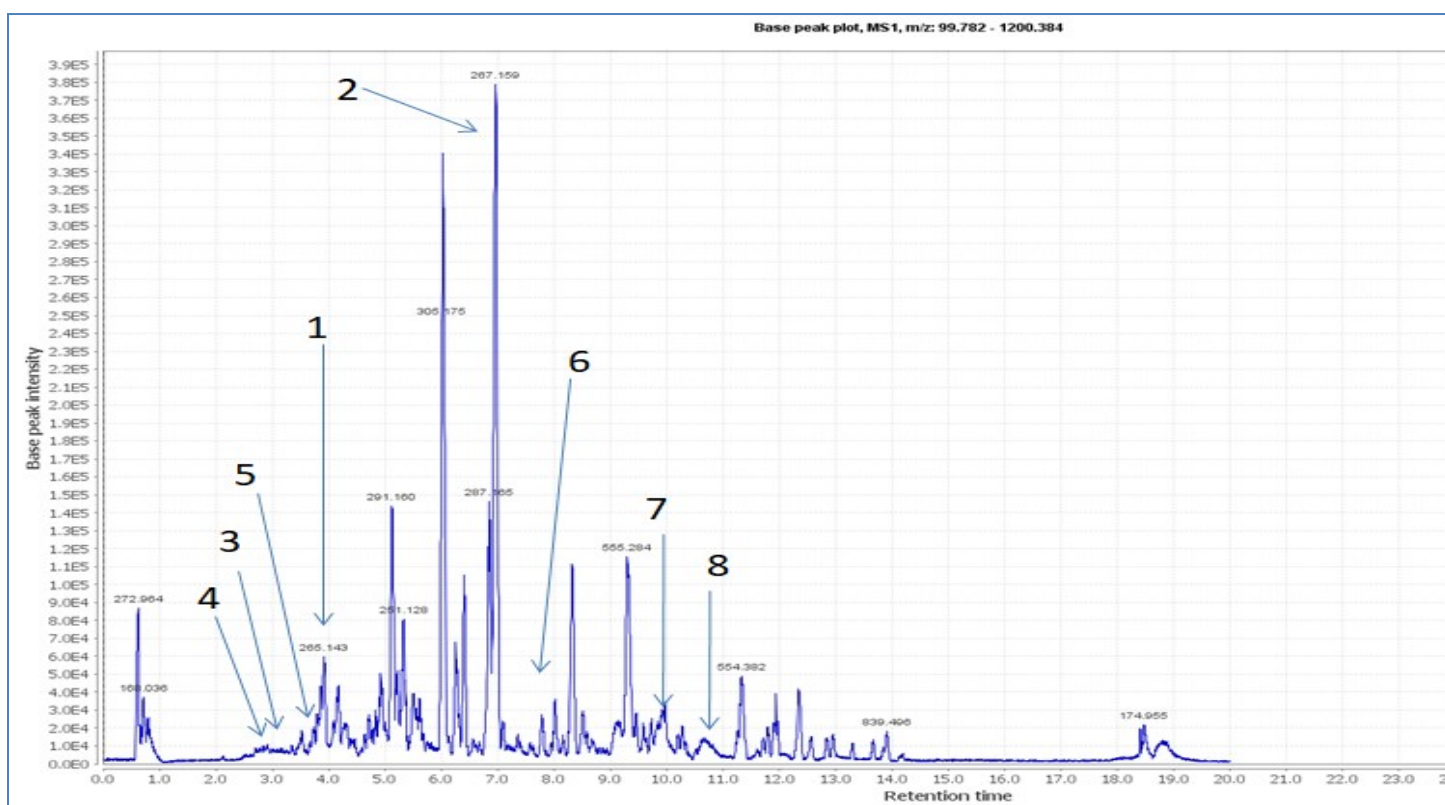

**Fig. S2: LC-MS chromatogram of metabolomics analysis of *Nephthea* sp.**

**Table S1: A list of the characterized metabolites from *Nephthea* sp.**

| No. | Compound                               | Molecular formula                              | Retention time<br>(min) | <i>m/z</i> |
|-----|----------------------------------------|------------------------------------------------|-------------------------|------------|
| 1   | Philippinlin E                         | C <sub>15</sub> H <sub>20</sub> O <sub>4</sub> | 6.25                    | 265.143    |
| 2   | 5,8-Epidioxy-11-hydroperoxy-6-eudesmen | C <sub>15</sub> H <sub>24</sub> O <sub>4</sub> | 5.29                    | 267.159    |
| 3   | Paralemnolin L                         | C <sub>17</sub> H <sub>24</sub> O <sub>3</sub> | 3.30                    | 276.196    |
| 4   | Laevinone A                            | C <sub>17</sub> H <sub>22</sub> O <sub>4</sub> | 3.22                    | 289.141    |
| 5   | Nardosinanol F                         | C <sub>17</sub> H <sub>22</sub> O <sub>4</sub> | 3.86                    | 291.158    |
| 6   | Nardosinanol I                         | C <sub>16</sub> H <sub>24</sub> O <sub>5</sub> | 8.42                    | 297.151    |
| 7   | Dendronpholide N                       | C <sub>25</sub> H <sub>42</sub> O <sub>8</sub> | 10.23                   | 469.262    |
| 8   | Dendronesterol B                       | C <sub>29</sub> H <sub>50</sub> O <sub>6</sub> | 11.31                   | 494.361    |
